# Supplementary material for: The neural crest transcription factor Brn3a is expressed in melanoma and required for cell cycle progression and survival
Source: PubMed Central journal article supplement (PMC3779452; doi:10.1002/emmm.201201862), 2013-05-13
Supplement: emmm0005-0919-SD1.pdf [file emmm0005-0919-SD1.pdf]

## The neural crest transcription factor Brn3a is expressed in melanoma and required for cell cycle progression and survival

Tobias Hohenauer, Carola Berking, Andreas Schmidt, Sebastian Haferkamp, Daniela Senft, Claudia Kammerbauer, Sabine Fraschka, Saskia Anna Graf, Martin Irmeler, Johannes Beckers, Michael Flaig, Achim Aigner, Sabrina Höbel, Franziska Hoffmann, Heiko Hermeking, Simon Rothenfusser, Stefan Endres, Thomas Ruzicka, Robert Besch

*Corresponding author: Robert Besch, Ludwig-Maximilian University*

---

**Review timeline:**

Submission date:  
Accepted:

10 August 2012  
04 April 2013

---

*Editor: Anneke Funk / Céline Carret*

**Transaction Report:**

No Peer Review Process File is available with this article, as the authors have chosen not to make the review process public in this case.
